# Supplementary material for: Multiple Myeloma-Derived Extracellular Vesicles Induce Osteoclastogenesis through the Activation of the XBP1/IRE1α Axis
Source: MDPI journal article supplement (doi:10.3390/cancers12082167), 2020-08-04

# Supplementary Materials: Multiple Myeloma-Derived Extracellular Vesicles Induce Osteoclastogenesis through the Activation of the XBP1/IRE1 $\alpha$ Axis

Lavinia Raimondi, Angela De Luca, Simona Fontana, Nicola Amodio, Viviana Costa, Valeria Carina, Daniele Bellavia, Stefania Raimondo, Sergio Siragusa, Francesca Monteleone, Riccardo Alessandro, Milena Fini and Gianluca Giavaresi

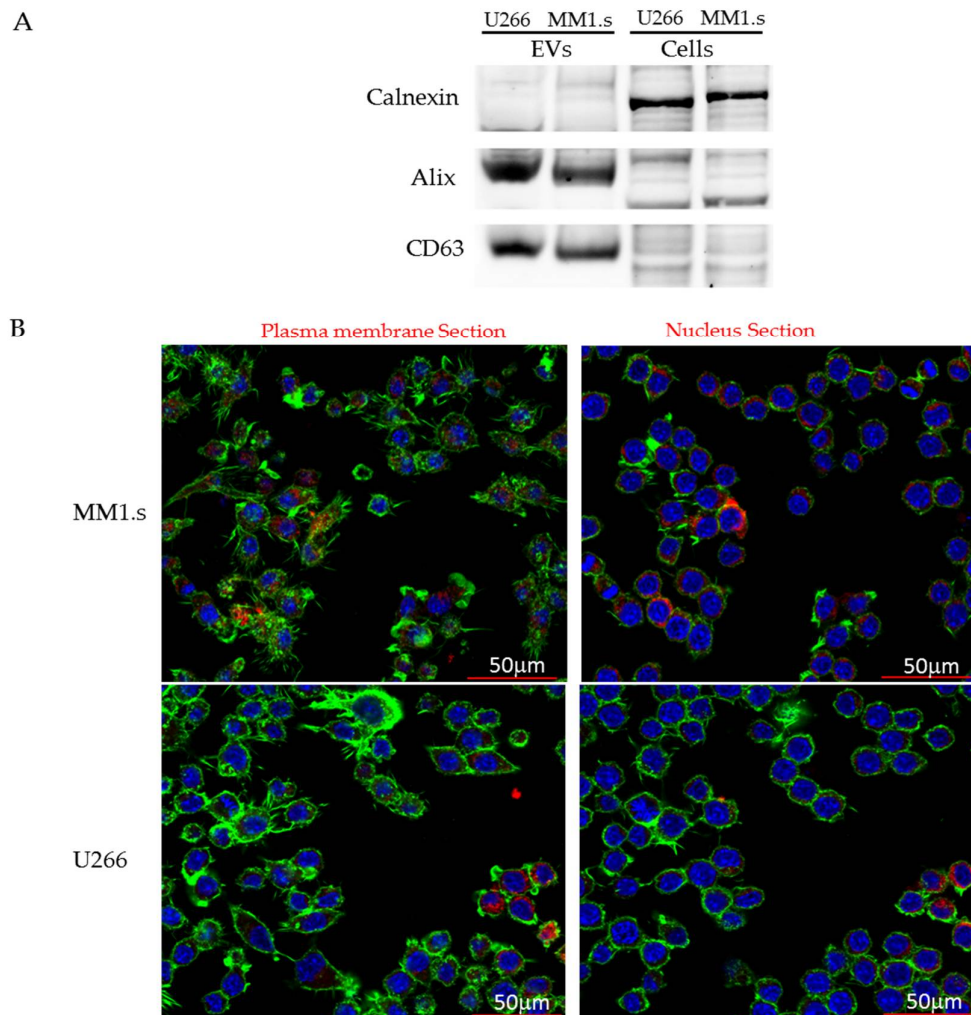

**Figure S1.** A. Western blotting analysis of Alix, CD63 and Calnexin in U266-, MM1.s-EVs and cellular lysates. B. Uptake of MM-Evs by Raw264.7 cells; analysis at confocal microscopy of Raw264.7 cells treated for 6 hours with 25  $\mu$ g/ml of MM1.s- and U266-EVs. Raw264.7 cells were stained with Actin green (green), nuclear counterstaining was performed using Hoescht (blue) and exosomes were labelled with PKH26 (red). Scale bar = 50  $\mu$ m.

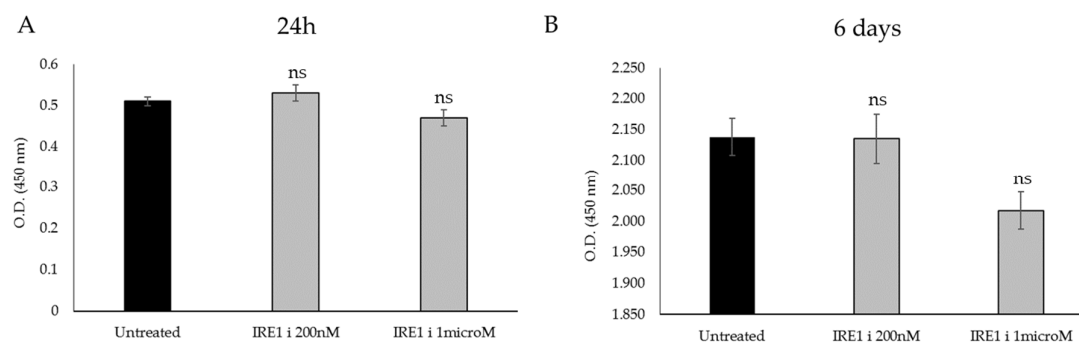

**Figure S2.** Cell viability assay was evaluated through WST-1 assay of Raw264.7 cells untreated or Table 200. nm or 1microM of IRE1a inhibitor, at 24 hours (A) and 6 days (B) of culture.

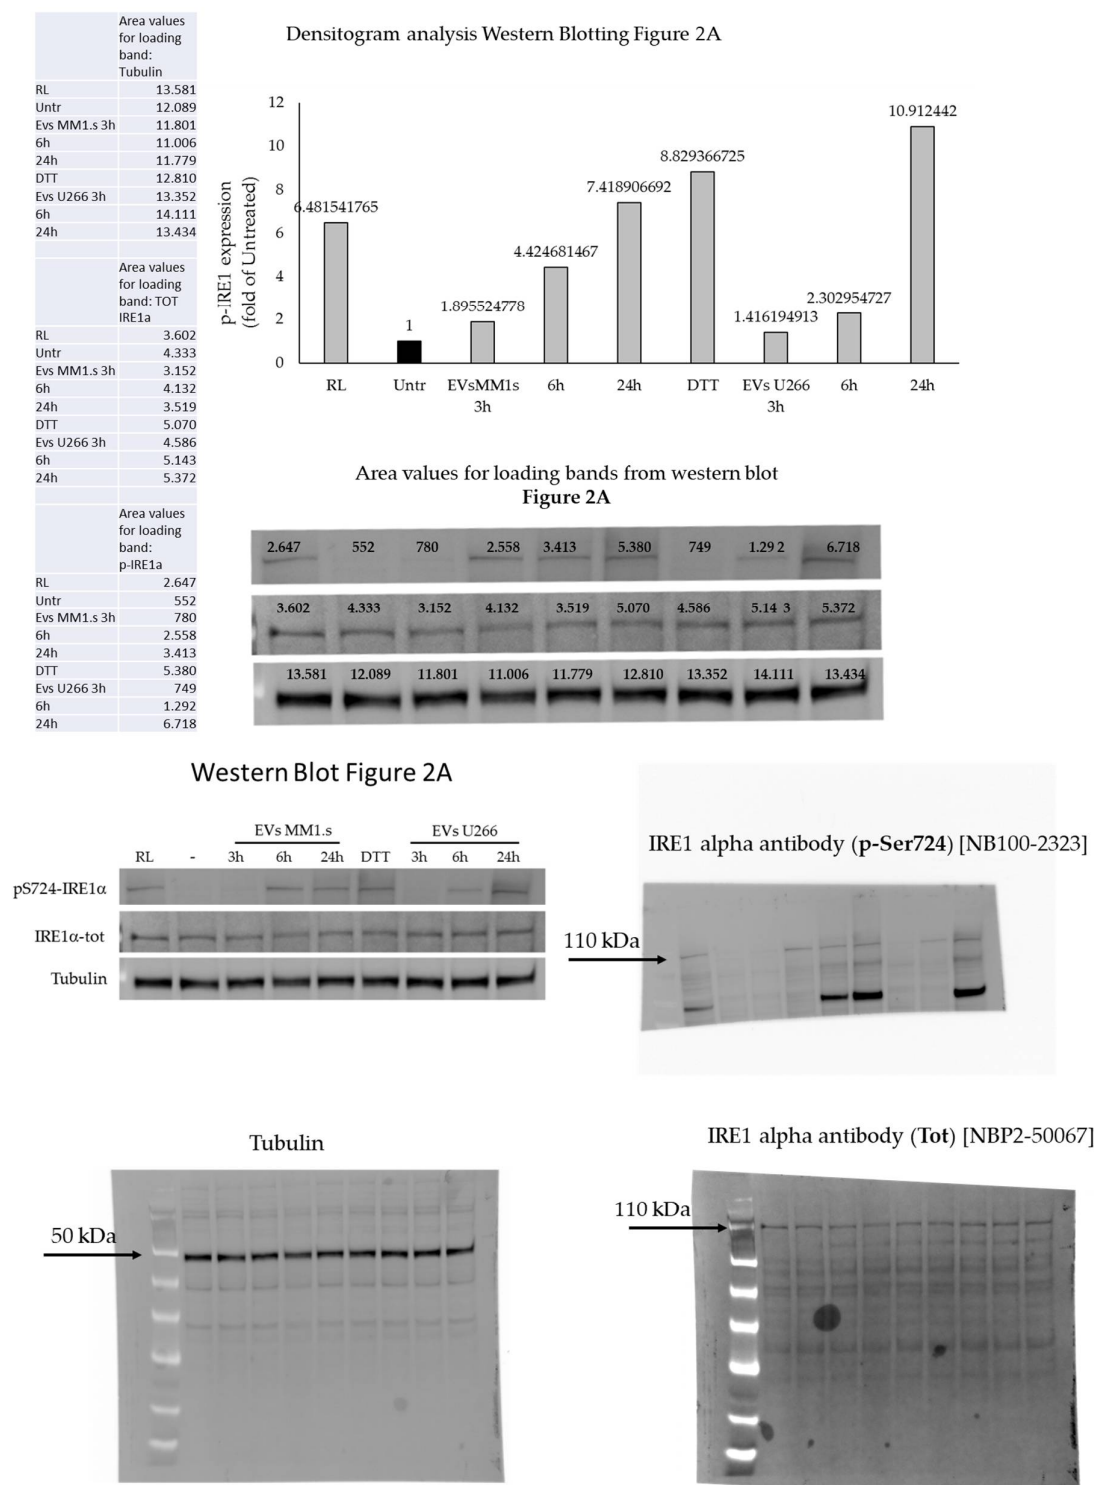

Figure S3. Whole Western Blot for Figure 2A.

Area values for loading bands from western blot **Figure 3A**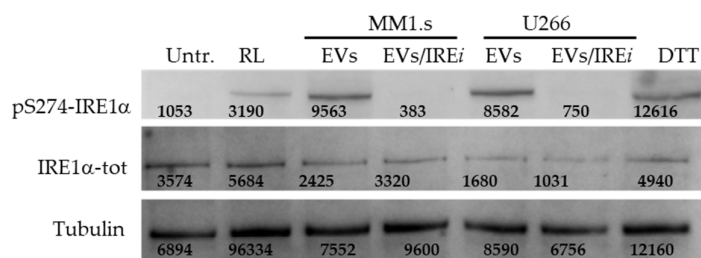Densitogram analysis Western Blotting **Figure 3A**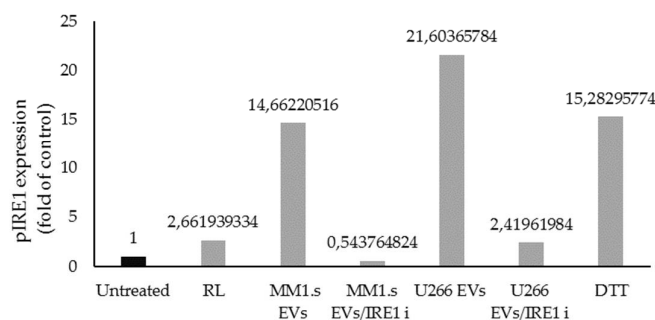

| Area values for loading band: | Area values for loading band: | Area values for loading band: |
|-------------------------------|-------------------------------|-------------------------------|
| Tubulin                       | TOT IRE1 a                    | P-IRE1 a                      |
| 6.894                         | 3.574                         | 1.053                         |
| 9.634                         | 5.684                         | 3.190                         |
| 7.552                         | 2.425                         | 9.563                         |
| 9.600                         | 3.329                         | 383                           |
| 8.590                         | 1.680                         | 8.582                         |
| 6.756                         | 1.031                         | 750                           |
| 12.160                        | 4.942                         | 12.616                        |

IRE1 alpha antibody (p-Ser724) [NB100-2323]

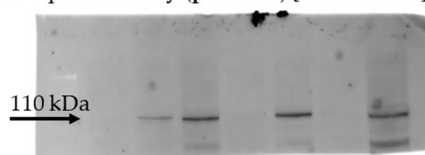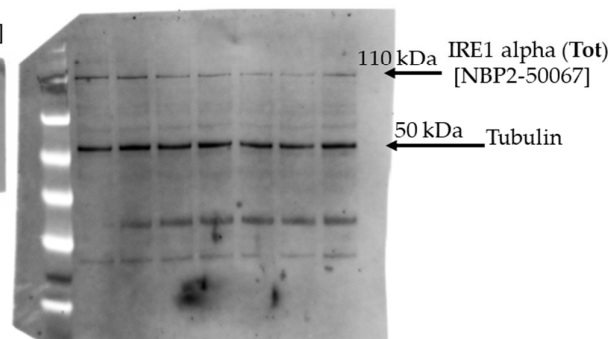**Figure S4.** Whole Western Blot for Figure 3A.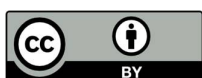

Supplement: s1 [file s1]
