# Supplementary material for: Multiple Myeloma-Derived Extracellular Vesicles Induce Osteoclastogenesis through the Activation of the XBP1/IRE1α Axis
Source: Cancers (Basel). 2020 Aug 4;12(8):2167. doi: 10.3390/cancers12082167 (PMC7465175; doi:10.3390/cancers12082167)
Supplement: Supplementary file 1 [file cancers-12-02167-s001.zip › Supplementary Table S1.xlsx]

## Sheet: MM1S_exos_ID
#	UniProt Accession Number	UniProt Knowledgebase*	UniProt Entry Name	Protein Name	Gene Name	No. of Identified Peptides > 95% Conf	Protein Pilot Unused Score	%Cov(95)
1	P01023	sp	A2MG_HUMAN	Alpha-2-macroglobulin	A2M	198	86.22	32.56
2	Q9BWD1	sp	THIC_HUMAN	Acetyl-CoA acetyltransferase, cytosolic	ACAT2	2	2	9.572
3	A0A0A0MSN4	tr	A0A0A0MSN4_HUMAN	Angiotensin-converting enzyme	ACE	5	5.29	5.475
4	P22303	sp	ACES_HUMAN	Acetylcholinesterase	ACHE	1	2	2.117
5	P53396	sp	ACLY_HUMAN	ATP-citrate synthase	ACLY	8	14.04	8.81
6	P21399	sp	ACOC_HUMAN	Cytoplasmic aconitate hydratase	ACO1	16	22.66	25.87
7	F2Z2Q9	tr	F2Z2Q9_HUMAN	Low molecular weight phosphotyrosine protein phosphatase	ACP1	1	2.42	12.86
8	P62736	sp	ACTA_HUMAN	Actin, aortic smooth muscle	ACTA2	16	6.34	44.56
9	P60709	sp	ACTB_HUMAN	Actin, cytoplasmic 1	ACTB	43	2.02	66.93
10	P63261	sp	ACTG_HUMAN	Actin, cytoplasmic 2	ACTG1	43	38.35	66.93
11	R4GMT0	tr	R4GMT0_HUMAN	Alpha-centractin	ACTR1A	2	3.96	11.45
12	P61160	sp	ARP2_HUMAN	Actin-related protein 2	ACTR2	2	3.18	5.838
13	P61158	sp	ARP3_HUMAN	Actin-related protein 3	ACTR3	5	8.93	21.05
14	O14672	sp	ADA10_HUMAN	Disintegrin and metalloproteinase domain-containing protein 10	ADAM10	1	2	1.872
15	Q76LX8	sp	ATS13_HUMAN	A disintegrin and metalloproteinase with thrombospondin motifs 13	ADAMTS13	5	6.25	4.135
16	Q6UY14	sp	ATL4_HUMAN	ADAMTS-like protein 4	ADAMTSL4	1	2	1.49
17	P11766	sp	ADHX_HUMAN	Alcohol dehydrogenase class-3	ADH5	2	4	5.08
18	P55263	sp	ADK_HUMAN	Adenosine kinase	ADK	7	8.38	25.97
19	A0A1B0GWJ0	tr	A0A1B0GWJ0_HUMAN	Adenylosuccinate lyase	ADSL	2	1.13	8.542
20	P43652	sp	AFAM_HUMAN	Afamin	AFM	2	4.03	2.337
21	J3KMX3	tr	J3KMX3_HUMAN	Alpha-fetoprotein	AFP	16	14.4	19.13
22	P35573	sp	GDE_HUMAN	Glycogen debranching enzyme	AGL	4	6.06	4.308
23	P23526	sp	SAHH_HUMAN	Adenosylhomocysteinase	AHCY	15	22.11	34.72
24	P02765	sp	FETUA_HUMAN	Alpha-2-HS-glycoprotein	AHSG	4	4.44	5.45
25	P14550	sp	AK1A1_HUMAN	Aldo-keto reductase family 1 member A1	AKR1A1	11	14	46.46
26	P15121	sp	ALDR_HUMAN	Aldose reductase	AKR1B1	3	2.82	18.35
27	P51857	sp	AK1D1_HUMAN	3-oxo-5-beta-steroid 4-dehydrogenase	AKR1D1	2	4.07	9.509
28	Q8NHP1	sp	ARK74_HUMAN	Aflatoxin B1 aldehyde reductase member 4	AKR7L	2	4	10.57
29	P13716	sp	HEM2_HUMAN	Delta-aminolevulinic acid dehydratase	ALAD	1	0.81	3.03
30	A0A0C4DGB6	tr	A0A0C4DGB6_HUMAN	Serum albumin	ALB	82	44.71	38.41
31	Q8IZ83	sp	A16A1_HUMAN	Aldehyde dehydrogenase family 16 member A1	ALDH16A1	2	4.08	3.117
32	P00352	sp	AL1A1_HUMAN	Retinal dehydrogenase 1	ALDH1A1	1	1.03	2.595
33	O75891	sp	AL1L1_HUMAN	Cytosolic 10-formyltetrahydrofolate dehydrogenase	ALDH1L1	7	13.09	10.53
34	Q9H2A2	sp	AL8A1_HUMAN	2-aminomuconic semialdehyde dehydrogenase	ALDH8A1	1	2	5.133
35	P49189	sp	AL9A1_HUMAN	4-trimethylaminobutyraldehyde dehydrogenase	ALDH9A1	3	6.21	7.895
36	H3BQN4	tr	H3BQN4_HUMAN	Fructose-bisphosphate aldolase	ALDOA	5	7.97	27.7
37	A0A3B3IS80	tr	A0A3B3IS80_HUMAN	Fructose-bisphosphate aldolase	ALDOB	2	4	8.187
38	P09972	sp	ALDOC_HUMAN	Fructose-bisphosphate aldolase C	ALDOC	3	2	18.41
39	P19961	sp	AMY2B_HUMAN	Alpha-amylase 2B	AMY2B	12	16.07	32.49
40	Q8NI99	sp	ANGL6_HUMAN	Angiopoietin-related protein 6	ANGPTL6	1	2	3.191
41	Q06278	sp	AOXA_HUMAN	Aldehyde oxidase	AOX1	1	2	0.9716
42	A0A087WY71	tr	A0A087WY71_HUMAN	AP-2 complex subunit mu	AP2M1	1	2	4.608
43	F8W696	tr	F8W696_HUMAN	Apolipoprotein A-I	APOA1	1	2	6.531
44	P04114	sp	APOB_HUMAN	Apolipoprotein B-100	APOB	5	6.51	1.687
45	B0YIW2	tr	B0YIW2_HUMAN	Apolipoprotein C-III variant 1	APOC3	1	2	13.68
46	P02649	sp	APOE_HUMAN	Apolipoprotein E	APOE	4	5.3	13.88
47	P84077	sp	ARF1_HUMAN	ADP-ribosylation factor 1	ARF1	6	10.07	37.02
48	P18085	sp	ARF4_HUMAN	ADP-ribosylation factor 4	ARF4	2	2.01	17.22
49	O15145	sp	ARPC3_HUMAN	Actin-related protein 2/3 complex subunit 3	ARPC3	1	1.07	7.303
50	P04424	sp	ARLY_HUMAN	Argininosuccinate lyase	ASL	4	7.5	13.15
51	P08243	sp	ASNS_HUMAN	Asparagine synthetase [glutamine-hydrolyzing]	ASNS	0	0.69	0
52	Q9BXN1	sp	ASPN_HUMAN	Asporin	ASPN	5	4.03	14.74
53	P00966	sp	ASSY_HUMAN	Argininosuccinate synthase	ASS1	7	10.37	26.46
54	P31939	sp	PUR9_HUMAN	Bifunctional purine biosynthesis protein PURH	ATIC	15	26.84	38.18
55	P38606	sp	VATA_HUMAN	V-type proton ATPase catalytic subunit A	ATP6V1A	4	0.74	11.67
56	Q5T1B0	sp	AXDN1_HUMAN	Axonemal dynein light chain domain-containing protein 1	AXDND1	1	1.04	0.8893
57	P15291	sp	B4GT1_HUMAN	Beta-1,4-galactosyltransferase 1	B4GALT1	1	1.89	2.01
58	O43505	sp	B4GA1_HUMAN	Beta-1,4-glucuronyltransferase 1	B4GAT1	5	4.31	20.96
59	O75531	sp	BAF_HUMAN	Barrier-to-autointegration factor	BANF1	1	2.26	26.97
60	Q93088	sp	BHMT1_HUMAN	Betaine--homocysteine S-methyltransferase 1	BHMT	6	10	21.67
61	P30043	sp	BLVRB_HUMAN	Flavin reductase (NADPH)	BLVRB	8	8	32.04
62	Q9H8M2	sp	BRD9_HUMAN	Bromodomain-containing protein 9	BRD9	1	0.73	1.173
63	Q6RI45	sp	BRWD3_HUMAN	Bromodomain and WD repeat-containing protein 3	BRWD3	3	3.96	1.776
64	E9PGA6	tr	E9PGA6_HUMAN	C1QTNF3-AMACR readthrough (NMD candidate)	C1QTNF3-AMACR	1	2	4.577
65	P01024	sp	CO3_HUMAN	Complement C3	C3	46	49.77	18.64
66	A0A0G2JPR0	tr	A0A0G2JPR0_HUMAN	Complement C4-A	C4A	24	22.86	13.47
67	P04003	sp	C4BPA_HUMAN	C4b-binding protein alpha chain	C4BPA	1	2.45	1.34
68	P01031	sp	CO5_HUMAN	Complement C5	C5	8	8.67	6.683
69	P10643	sp	CO7_HUMAN	Complement component C7	C7	4	8.03	4.389
70	P02748	sp	CO9_HUMAN	Complement component C9	C9	3	2.76	5.725
71	Q9BTV7	sp	CABL2_HUMAN	CDK5 and ABL1 enzyme substrate 2	CABLES2	1	2	2.092
72	Q86VP6	sp	CAND1_HUMAN	Cullin-associated NEDD8-dissociated protein 1	CAND1	3	3.68	3.089
73	Q01518	sp	CAP1_HUMAN	Adenylyl cyclase-associated protein 1	CAP1	4	6.01	11.37
74	P52907	sp	CAZA1_HUMAN	F-actin-capping protein subunit alpha-1	CAPZA1	1	2	6.294
75	A0A0D9SET8	tr	A0A0D9SET8_HUMAN	F-actin-capping protein subunit alpha	CAPZA2	1	2.1	10.34
76	P55212	sp	CASP6_HUMAN	Caspase-6	CASP6	1	1.49	3.754
77	P04040	sp	CATA_HUMAN	Catalase	CAT	4	3.13	11.57
78	P16152	sp	CBR1_HUMAN	Carbonyl reductase [NADPH] 1	CBR1	8	16.35	34.3
79	A0A0A0MTQ8	tr	A0A0A0MTQ8_HUMAN	Coiled-coil domain-containing protein 175	CCDC175	1	1.1	0.9662
80	F5GWF6	tr	F5GWF6_HUMAN	T-complex protein 1 subunit beta	CCT2	6	9.8	16.79
81	P49368	sp	TCPG_HUMAN	T-complex protein 1 subunit gamma	CCT3	7	11.48	20.18
82	P50991	sp	TCPD_HUMAN	T-complex protein 1 subunit delta	CCT4	3	6.37	7.236
83	E7ENZ3	tr	E7ENZ3_HUMAN	T-complex protein 1 subunit epsilon	CCT5	1	2.02	2.881
84	P40227	sp	TCPZ_HUMAN	T-complex protein 1 subunit zeta	CCT6A	3	5.77	11.11
85	Q99832	sp	TCPH_HUMAN	T-complex protein 1 subunit eta	CCT7	3	6.06	12.15
86	P50990	sp	TCPQ_HUMAN	T-complex protein 1 subunit theta	CCT8	3	6.08	6.752
87	Q6YHK3	sp	CD109_HUMAN	CD109 antigen	CD109	3	4.96	2.699
88	P16070	sp	CD44_HUMAN	CD44 antigen	CD44	1	2	1.617
89	Q16543	sp	CDC37_HUMAN	Hsp90 co-chaperone Cdc37	CDC37	1	1.54	5.556
90	P60953	sp	CDC42_HUMAN	Cell division control protein 42 homolog	CDC42	2	4	19.9
91	Q9NYQ6	RRRRRsp	CELR1_HUMAN	REVERSED Cadherin EGF LAG seven-pass G-type receptor 1	CELSR1	1	0.72	0.4313
92	Q9C0D2	sp	CE295_HUMAN	Centrosomal protein of 295 kDa	CEP295	1	2	0.2691
93	P08603	sp	CFAH_HUMAN	Complement factor H	CFH	1	2	1.462
94	G3XAM2	tr	G3XAM2_HUMAN	Complement factor I	CFI	1	2	2.257
95	E9PK25	tr	E9PK25_HUMAN	Cofilin-1	CFL1	10	15.18	50
96	G5E9W2	tr	G5E9W2_HUMAN	Hexosyltransferase	CHPF2	1	2	1.44
97	P12277	sp	KCRB_HUMAN	Creatine kinase B-type	CKB	4	5.2	23.36
98	Q9Y240	sp	CLC11_HUMAN	C-type lectin domain family 11 member A	CLEC11A	7	7.62	23.22
99	E9PHK0	tr	E9PHK0_HUMAN	Tetranectin	CLEC3B	1	1.29	7.5
100	O00299	sp	CLIC1_HUMAN	Chloride intracellular channel protein 1	CLIC1	6	11.8	34.02
101	Q9Y696	sp	CLIC4_HUMAN	Chloride intracellular channel protein 4	CLIC4	1	2.29	7.115
102	A0A087WVQ6	tr	A0A087WVQ6_HUMAN	Clathrin heavy chain	CLTC	39	71.67	32.64
103	P10909	sp	CLUS_HUMAN	Clusterin	CLU	3	5.66	8.241
104	Q96KP4	sp	CNDP2_HUMAN	Cytosolic non-specific dipeptidase	CNDP2	4	8	12.21
105	Q12860	sp	CNTN1_HUMAN	Contactin-1	CNTN1	4	7.63	5.305
106	Q03692	sp	COAA1_HUMAN	Collagen alpha-1(X) chain	COL10A1	1	2	1.912
107	P02452	sp	CO1A1_HUMAN	Collagen alpha-1(I) chain	COL1A1	6	8	7.582
108	A0A087WTA8	tr	A0A087WTA8_HUMAN	Collagen alpha-2(I) chain	COL1A2	2	4	2.126
109	P02461	sp	CO3A1_HUMAN	Collagen alpha-1(III) chain	COL3A1	3	6.08	3.206
110	A0A087X0S5	tr	A0A087X0S5_HUMAN	Collagen alpha-1(VI) chain	COL6A1	10	17.72	13.16
111	P12110	sp	CO6A2_HUMAN	Collagen alpha-2(VI) chain	COL6A2	4	4.06	7.458
112	P12111	sp	CO6A3_HUMAN	Collagen alpha-3(VI) chain	COL6A3	11	18.8	4.69
113	P49747	sp	COMP_HUMAN	Cartilage oligomeric matrix protein	COMP	5	4.13	7.794
114	Q9Y678	sp	COPG1_HUMAN	Coatomer subunit gamma-1	COPG1	1	2.03	1.373
115	D6RD63	tr	D6RD63_HUMAN	COP9 signalosome complex subunit 4 (Fragment)	COPS4	1	2.59	7.273
116	P31146	sp	COR1A_HUMAN	Coronin-1A	CORO1A	5	3.83	14.1
117	Q9BR76	sp	COR1B_HUMAN	Coronin-1B	CORO1B	1	2.01	5.93
118	B4E3S0	tr	B4E3S0_HUMAN	Coronin	CORO1C	1	1.64	4.336
119	P00450	sp	CERU_HUMAN	Ceruloplasmin	CP	6	4.42	8.92
120	P15169	sp	CBPN_HUMAN	Carboxypeptidase N catalytic chain	CPN1	5	9.46	21.4
121	P31327	sp	CPSM_HUMAN	Carbamoyl-phosphate synthase [ammonia], mitochondrial	CPS1	2	4.08	1.733
122	Q08257	sp	QOR_HUMAN	Quinone oxidoreductase	CRYZ	1	1.68	3.343
123	A0A2R8YD58	tr	A0A2R8YD58_HUMAN	Casein kinase II subunit alpha	CSNK2A1	2	4	8.777
124	P21291	sp	CSRP1_HUMAN	Cysteine and glycine-rich protein 1	CSRP1	1	2	7.772
125	F8VW96	tr	F8VW96_HUMAN	Cysteine and glycine-rich protein 2	CSRP2	1	1.7	4.115
126	P04080	sp	CYTB_HUMAN	Cystatin-B	CSTB	1	2	21.43
127	B4E1E0	tr	B4E1E0_HUMAN	CTP synthase	CTPS1	1	2.14	2.759
128	P14868	sp	SYDC_HUMAN	Aspartate--tRNA ligase, cytoplasmic	DARS	1	1.28	2.994
129	J3QL34	tr	J3QL34_HUMAN	L-xylulose reductase (Fragment)	DCXR	1	2	6.25
130	A0A2R8YF78	tr	A0A2R8YF78_HUMAN	ATP-dependent RNA helicase DDX3X	DDX3X	1	1.13	3.432
131	Q9UGM3	sp	DMBT1_HUMAN	Deleted in malignant brain tumors 1 protein	DMBT1	9	6.66	7.087
132	Q8TD57	RRRRRsp	DYH3_HUMAN	REVERSED Dynein heavy chain 3, axonemal	DNAH3	1	1.23	0.2187
133	G8JLD5	tr	G8JLD5_HUMAN	Dynamin-1-like protein	DNM1L	4	6.95	8.146
134	Q9UQ16	sp	DYN3_HUMAN	Dynamin-3	DNM3	1	2	2.186
135	G3V1D3	tr	G3V1D3_HUMAN	Dipeptidyl peptidase 3	DPP3	3	4.78	7.407
136	Q14204	sp	DYHC1_HUMAN	Cytoplasmic dynein 1 heavy chain 1	DYNC1H1	27	46.97	9.664
137	Q9Y6G9	sp	DC1L1_HUMAN	Cytoplasmic dynein 1 light intermediate chain 1	DYNC1LI1	1	2	3.633
138	P68104	sp	EF1A1_HUMAN	Elongation factor 1-alpha 1	EEF1A1	14	18.58	34.85
139	Q8WVE0	sp	EFMT1_HUMAN	EEF1A lysine methyltransferase 1	EEF1AKMT1	1	0.94	5.607
140	E9PRY8	tr	E9PRY8_HUMAN	Elongation factor 1-delta	EEF1D	1	1.52	1.722
141	P26641	sp	EF1G_HUMAN	Elongation factor 1-gamma	EEF1G	6	11.01	17.62
142	P13639	sp	EF2_HUMAN	Elongation factor 2	EEF2	20	33.66	30.54
143	A0A024R571	tr	A0A024R571_HUMAN	EH domain-containing protein 1	EHD1	13	8.39	34.12
144	Q9NZN3	sp	EHD3_HUMAN	EH domain-containing protein 3	EHD3	16	28.31	40.56
145	Q14152	sp	EIF3A_HUMAN	Eukaryotic translation initiation factor 3 subunit A	EIF3A	1	1.89	0.9407
146	P60842	sp	IF4A1_HUMAN	Eukaryotic initiation factor 4A-I	EIF4A1	5	10.04	16.75
147	E7EQG2	tr	E7EQG2_HUMAN	Eukaryotic initiation factor 4A-II	EIF4A2	5	1.52	18.78
148	H0Y8X3	tr	H0Y8X3_HUMAN	Eukaryotic translation initiation factor 4E type 1B (Fragment)	EIF4E1B	1	2	4.094
149	K7EIK7	tr	K7EIK7_HUMAN	Echinoderm microtubule-associated protein-like 2	EML2	5	6.25	10.74
150	P06733	sp	ENOA_HUMAN	Alpha-enolase	ENO1	21	27.38	50.46
151	P13929	sp	ENOB_HUMAN	Beta-enolase	ENO3	5	2.01	19.12
152	P07814	sp	SYEP_HUMAN	Bifunctional glutamate/proline--tRNA ligase	EPRS	2	1.34	1.72
153	Q16394	sp	EXT1_HUMAN	Exostosin-1	EXT1	5	8.17	12.33
154	Q93063	sp	EXT2_HUMAN	Exostosin-2	EXT2	4	6.1	11.14
155	E7EQR4	tr	E7EQR4_HUMAN	Ezrin	EZR	3	4.94	5.631
156	P00742	sp	FA10_HUMAN	Coagulation factor X	F10	3	4.14	12.91
157	P00488	sp	F13A_HUMAN	Coagulation factor XIII A chain	F13A1	6	9.4	13.25
158	P00734	sp	THRB_HUMAN	Prothrombin	F2	33	24.46	23.47
159	P12259	sp	FA5_HUMAN	Coagulation factor V	F5	20	24.67	9.173
160	P00451	sp	FA8_HUMAN	Coagulation factor VIII	F8	1	2	0.638
161	P00740	sp	FA9_HUMAN	Coagulation factor IX	F9	1	2	2.603
162	Q96GK7	sp	FAH2A_HUMAN	Fumarylacetoacetate hydrolase domain-containing protein 2A	FAHD2A	1	1.96	4.777
163	Q8IXL6	sp	FA20C_HUMAN	Extracellular serine/threonine protein kinase FAM20C	FAM20C	2	3.03	4.795
164	A0A0D9SEN1	tr	A0A0D9SEN1_HUMAN	Prolyl endopeptidase FAP	FAP	3	6.1	6.588
165	Q9NSD9	sp	SYFB_HUMAN	Phenylalanine--tRNA ligase beta subunit	FARSB	1	1.34	3.735
166	A0A0U1RQF0	tr	A0A0U1RQF0_HUMAN	Fatty acid synthase	FASN	1	2.08	0.7573
167	Q6V0I7	sp	FAT4_HUMAN	Protocadherin Fat 4	FAT4	2	2.3	0.8231
168	P23142	sp	FBLN1_HUMAN	Fibulin-1	FBLN1	11	16.71	18.63
169	A0A3B3IUC7	tr	A0A3B3IUC7_HUMAN	Fructose-1,6-bisphosphatase 1	FBP1	2	4.4	9.89
170	Q86UX7	sp	URP2_HUMAN	Fermitin family homolog 3	FERMT3	9	11.15	23.84
171	P02671	sp	FIBA_HUMAN	Fibrinogen alpha chain	FGA	2	2	2.656
172	P02675	sp	FIBB_HUMAN	Fibrinogen beta chain	FGB	14	15.27	24.44
173	C9JEU5	tr	C9JEU5_HUMAN	Fibrinogen gamma chain	FGG	14	12.47	31.01
174	P07954	sp	FUMH_HUMAN	Fumarate hydratase, mitochondrial	FH	1	2.01	4.51
175	P21333	sp	FLNA_HUMAN	Filamin-A	FLNA	50	90.99	32.04
176	O75369	sp	FLNB_HUMAN	Filamin-B	FLNB	4	1.78	2.344
177	J3QLD9	tr	J3QLD9_HUMAN	Flotillin-2	FLOT2	1	2.25	2.804
178	A0A3B3IRN5	tr	A0A3B3IRN5_HUMAN	Fibromodulin	FMOD	3	4.35	18.47
179	P02751	sp	FINC_HUMAN	Fibronectin	FN1	79	98.45	32.44
180	Q16658	sp	FSCN1_HUMAN	Fascin	FSCN1	1	2	4.868
181	Q12841	sp	FSTL1_HUMAN	Follistatin-related protein 1	FSTL1	2	3.02	8.117
182	O95954	sp	FTCD_HUMAN	Formimidoyltransferase-cyclodeaminase	FTCD	1	2	3.882
183	P02794	sp	FRIH_HUMAN	Ferritin heavy chain	FTH1	16	16.19	39.89
184	E9PD92	tr	E9PD92_HUMAN	Glucose-6-phosphate 1-dehydrogenase (Fragment)	G6PD	1	2	6.25
185	P51570	sp	GALK1_HUMAN	Galactokinase	GALK1	5	6	15.05
186	Q96C23	sp	GALM_HUMAN	Aldose 1-epimerase	GALM	3	6	14.91
187	P04406	sp	G3P_HUMAN	Glyceraldehyde-3-phosphate dehydrogenase	GAPDH	16	22.43	45.97
188	P41250	sp	GARS_HUMAN	Glycine--tRNA ligase	GARS	2	2.19	3.518
189	P22102	sp	PUR2_HUMAN	Trifunctional purine biosynthetic protein adenosine-3	GART	1	1.72	1.386
190	D6RF35	tr	D6RF35_HUMAN	Vitamin D-binding protein	GC	6	8.95	10.29
191	P50395	sp	GDIB_HUMAN	Rab GDP dissociation inhibitor beta	GDI2	7	14.17	22.7
192	Q06210	sp	GFPT1_HUMAN	Glutamine--fructose-6-phosphate aminotransferase [isomerizing] 1	GFPT1	2	4.55	3.863
193	Q92820	sp	GGH_HUMAN	Gamma-glutamyl hydrolase	GGH	1	1.52	2.83
194	F6TLX2	tr	F6TLX2_HUMAN	Glyoxalase domain-containing protein 4	GLOD4	1	2	2.59
195	Q96IJ6	sp	GMPPA_HUMAN	Mannose-1-phosphate guanyltransferase alpha	GMPPA	2	2.98	6.905
196	P62873	sp	GBB1_HUMAN	Guanine nucleotide-binding protein G(I)/G(S)/G(T) subunit beta-1	GNB1	2	2.87	7.647
197	P62879	sp	GBB2_HUMAN	Guanine nucleotide-binding protein G(I)/G(S)/G(T) subunit beta-2	GNB2	1	1.65	4.118
198	Q9Y223	sp	GLCNE_HUMAN	Bifunctional UDP-N-acetylglucosamine 2-epimerase/N-acetylmannosamine kinase	GNE	1	2	1.801
199	A0A2U3TZU2	tr	A0A2U3TZU2_HUMAN	Glucose-6-phosphate isomerase	GPI	1	2	2.513
200	P07203	sp	GPX1_HUMAN	Glutathione peroxidase 1	GPX1	2	2	18.23
201	A0A087X1J7	tr	A0A087X1J7_HUMAN	Glutathione peroxidase	GPX3	2	2.2	12.89
202	P06396	sp	GELS_HUMAN	Gelsolin	GSN	21	25.09	28.52
203	Q16772	sp	GSTA3_HUMAN	Glutathione S-transferase A3	GSTA3	4	2.09	15.32
204	F6XZQ7	tr	F6XZQ7_HUMAN	Glutathione S-transferase	GSTM2	1	2	7.727
205	P09211	sp	GSTP1_HUMAN	Glutathione S-transferase P	GSTP1	4	8	26.67
206	G3V4T6	tr	G3V4T6_HUMAN	Maleylacetoacetate isomerase	GSTZ1	1	2.03	9.217
207	P16104	sp	H2AX_HUMAN	Histone H2AX	H2AFX	7	10.68	32.17
208	Q9P0M6	sp	H2AW_HUMAN	Core histone macro-H2A.2	H2AFY2	1	2	4.57
209	Q14520	sp	HABP2_HUMAN	Hyaluronan-binding protein 2	HABP2	2	1.49	4.107
210	P42357	sp	HUTH_HUMAN	Histidine ammonia-lyase	HAL	1	2.16	1.674
211	P69905	sp	HBA_HUMAN	Hemoglobin subunit alpha	HBA1	48	21.09	47.18
212	P68871	sp	HBB_HUMAN	Hemoglobin subunit beta	HBB	21	14.64	60.54
213	P02042	sp	HBD_HUMAN	Hemoglobin subunit delta	HBD	16	6.01	72.79
214	P02100	sp	HBE_HUMAN	Hemoglobin subunit epsilon	HBE1	11	2.01	27.21
215	F5GWX2	tr	F5GWX2_HUMAN	Heme-binding protein 1	HEBP1	2	2.01	16.54
216	Q5GLZ8	sp	HERC4_HUMAN	Probable E3 ubiquitin-protein ligase HERC4	HERC4	1	2	1.135
217	Q93099	sp	HGD_HUMAN	Homogentisate 1,2-dioxygenase	HGD	2	4	7.191
218	D6RAR4	tr	D6RAR4_HUMAN	Hepatocyte growth factor activator	HGFAC	3	4.47	6.647
219	P49773	sp	HINT1_HUMAN	Histidine triad nucleotide-binding protein 1	HINT1	1	2	19.05
220	U3KQK0	tr	U3KQK0_HUMAN	Histone H2B	HIST1H2BN	6	5.39	20.48
221	P68431	sp	H31_HUMAN	Histone H3.1	HIST1H3A	6	5.91	36.76
222	P62805	sp	H4_HUMAN	Histone H4	HIST1H4A	9	15.52	53.4
223	P16188	sp	1A30_HUMAN	HLA class I histocompatibility antigen, A-30 alpha chain	HLA-A	4	7.06	15.34
224	Q5T7C4	tr	Q5T7C4_HUMAN	High mobility group protein B1	HMGB1	1	2.01	10.13
225	Q01581	sp	HMCS1_HUMAN	Hydroxymethylglutaryl-CoA synthase, cytoplasmic	HMGCS1	3	4.4	7.115
226	P09651	sp	ROA1_HUMAN	Heterogeneous nuclear ribonucleoprotein A1	HNRNPA1	1	2	2.688
227	H0Y8G5	tr	H0Y8G5_HUMAN	Heterogeneous nuclear ribonucleoprotein D0 (Fragment)	HNRNPD	2	4	8.462
228	P14866	sp	HNRPL_HUMAN	Heterogeneous nuclear ribonucleoprotein L	HNRNPL	1	1.14	2.207
229	Q00839	sp	HNRPU_HUMAN	Heterogeneous nuclear ribonucleoprotein U	HNRNPU	1	2.01	2.667
230	J3QR68	tr	J3QR68_HUMAN	Haptoglobin (Fragment)	HP	2	4.75	5.941
231	P07900	sp	HS90A_HUMAN	Heat shock protein HSP 90-alpha	HSP90AA1	12	8.87	21.86
232	P08238	sp	HS90B_HUMAN	Heat shock protein HSP 90-beta	HSP90AB1	18	29.14	30.52
233	P14625	sp	ENPL_HUMAN	Endoplasmin	HSP90B1	4	4.9	5.978
234	P48723	sp	HSP13_HUMAN	Heat shock 70 kDa protein 13	HSPA13	3	4.48	8.917
235	A0A0G2JIW1	tr	A0A0G2JIW1_HUMAN	Heat shock 70 kDa protein 1B	HSPA1B	20	32.29	35.05
236	P11021	sp	BIP_HUMAN	Endoplasmic reticulum chaperone BiP	HSPA5	5	1.45	4.74
237	P11142	sp	HSP7C_HUMAN	Heat shock cognate 71 kDa protein	HSPA8	27	44.03	46.9
238	F8WE04	tr	F8WE04_HUMAN	Heat shock protein beta-1	HSPB1	2	2.12	13.98
239	P98160	sp	PGBM_HUMAN	Basement membrane-specific heparan sulfate proteoglycan core protein	HSPG2	1	2.49	0.3188
240	O75874	sp	IDHC_HUMAN	Isocitrate dehydrogenase [NADP] cytoplasmic	IDH1	2	3.15	6.039
241	P01344	sp	IGF2_HUMAN	Insulin-like growth factor II	IGF2	2	4	22.22
242	P11717	sp	MPRI_HUMAN	Cation-independent mannose-6-phosphate receptor	IGF2R	7	8.11	3.292
243	P35858	sp	ALS_HUMAN	Insulin-like growth factor-binding protein complex acid labile subunit	IGFALS	5	4.12	9.256
244	C9JMY1	tr	C9JMY1_HUMAN	Insulin-like growth factor-binding protein 2	IGFBP2	1	1.68	7.182
245	A0A0B4J231	tr	A0A0B4J231_HUMAN	Immunoglobulin lambda-like polypeptide 5	IGLL5	5	5.58	32.09
246	A0A0A0MTH3	tr	A0A0A0MTH3_HUMAN	Integrin-linked protein kinase	ILK	11	19.25	38.51
247	P46940	sp	IQGA1_HUMAN	Ras GTPase-activating-like protein IQGAP1	IQGAP1	3	5.77	2.595
248	P05106	sp	ITB3_HUMAN	Integrin beta-3	ITGB3	2	1.92	2.919
249	P19827	sp	ITIH1_HUMAN	Inter-alpha-trypsin inhibitor heavy chain H1	ITIH1	3	4.01	2.525
250	P19823	sp	ITIH2_HUMAN	Inter-alpha-trypsin inhibitor heavy chain H2	ITIH2	16	16.92	16.49
251	Q06033	sp	ITIH3_HUMAN	Inter-alpha-trypsin inhibitor heavy chain H3	ITIH3	17	19.61	18.65
252	Q14624	sp	ITIH4_HUMAN	Inter-alpha-trypsin inhibitor heavy chain H4	ITIH4	6	2.89	6.022
253	P01591	sp	IGJ_HUMAN	Immunoglobulin J chain	JCHAIN	5	6	15.72
254	Q8WZ67	tr	Q8WZ67_HUMAN	NKG2-D type II integral membrane protein	KLRK1	1	0.62	12.5
255	P01042	sp	KNG1_HUMAN	Kininogen-1	KNG1	1	0.9	1.398
256	Q14974	sp	IMB1_HUMAN	Importin subunit beta-1	KPNB1	5	7.08	6.05
257	P04264	sp	K2C1_HUMAN	Keratin, type II cytoskeletal 1	KRT1	19	36.02	37.73
258	P13645	sp	K1C10_HUMAN	Keratin, type I cytoskeletal 10	KRT10	9	16.12	21.58
259	P13646	sp	K1C13_HUMAN	Keratin, type I cytoskeletal 13	KRT13	1	0.82	2.62
260	P35908	sp	K22E_HUMAN	Keratin, type II cytoskeletal 2 epidermal	KRT2	4	6.08	12.52
261	P35527	sp	K1C9_HUMAN	Keratin, type I cytoskeletal 9	KRT9	13	23.31	47.67
262	G3XAI2	tr	G3XAI2_HUMAN	Laminin subunit beta-1	LAMB1	1	2.07	0.8287
263	P28838	sp	AMPL_HUMAN	Cytosol aminopeptidase	LAP3	1	2.01	3.083
264	P00338	sp	LDHA_HUMAN	L-lactate dehydrogenase A chain	LDHA	5	4.31	22.29
265	P07195	sp	LDHB_HUMAN	L-lactate dehydrogenase B chain	LDHB	7	7.71	17.66
266	Q3ZCW2	sp	LEGL_HUMAN	Galectin-related protein	LGALSL	1	0.96	6.395
267	A0A0J9YXC7	tr	A0A0J9YXC7_HUMAN	LIM and senescent cell antigen-like-containing domain protein	LIMS4	6	7.89	13.57
268	P06858	sp	LIPL_HUMAN	Lipoprotein lipase	LPL	3	5.66	10.95
269	Q07954	sp	LRP1_HUMAN	Prolow-density lipoprotein receptor-related protein 1	LRP1	32	61.54	10.1
270	E7ER44	tr	E7ER44_HUMAN	Lactotransferrin	LTF	9	9.95	10.31
271	P51884	sp	LUM_HUMAN	Lumican	LUM	10	12.06	27.22
272	E5RGR0	tr	E5RGR0_HUMAN	Acyl-protein thioesterase 1 (Fragment)	LYPLA1	2	2	12.69
273	O95372	sp	LYPA2_HUMAN	Acyl-protein thioesterase 2	LYPLA2	2	2.01	18.18
274	O00754	sp	MA2B1_HUMAN	Lysosomal alpha-mannosidase	MAN2B1	2	1.32	2.374
275	P28482	sp	MK01_HUMAN	Mitogen-activated protein kinase 1	MAPK1	3	6	11.39
276	K7ERD8	tr	K7ERD8_HUMAN	Microtubule-associated protein RP/EB family member 2 (Fragment)	MAPRE2	2	4	14.95
277	F8W876	tr	F8W876_HUMAN	Mannan-binding lectin serine protease 1	MASP1	2	1.03	10.73
278	Q00266	sp	METK1_HUMAN	S-adenosylmethionine synthase isoform type-1	MAT1A	2	2.09	7.595
279	P31153	sp	METK2_HUMAN	S-adenosylmethionine synthase isoform type-2	MAT2A	1	2	3.797
280	Q14703	sp	MBTP1_HUMAN	Membrane-bound transcription factor site-1 protease	MBTPS1	1	2	2.376
281	P48163	sp	MAOX_HUMAN	NADP-dependent malic enzyme	ME1	1	2	3.497
282	B7ZL91	tr	B7ZL91_HUMAN	Meprin A subunit	MEP1A	1	2.04	1.421
283	Q10469	sp	MGAT2_HUMAN	Alpha-1,6-mannosyl-glycoprotein 2-beta-N-acetylglucosaminyltransferase	MGAT2	1	2	2.908
284	P08253	sp	MMP2_HUMAN	72 kDa type IV collagenase	MMP2	1	2	1.818
285	P05164	sp	PERM_HUMAN	Myeloperoxidase	MPO	1	2	1.879
286	B1AH49	tr	B1AH49_HUMAN	3-mercaptopyruvate sulfurtransferase	MPST	2	4.02	12.95
287	Q9UBG0	sp	MRC2_HUMAN	C-type mannose receptor 2	MRC2	10	14.25	11.22
288	A0A0A0MT08	tr	A0A0A0MT08_HUMAN	MROH7-TTC4 readthrough (NMD candidate)	MROH7-TTC4	1	2	0.5997
289	B4DUC8	tr	B4DUC8_HUMAN	S-methyl-5'-thioadenosine phosphorylase	MTAP	1	2.1	6
290	F5H2F4	tr	F5H2F4_HUMAN	C-1-tetrahydrofolate synthase, cytoplasmic	MTHFD1	5	8.11	6.569
291	P58546	sp	MTPN_HUMAN	Myotrophin	MTPN	1	2	14.41
292	Q14764	sp	MVP_HUMAN	Major vault protein	MVP	20	36.2	34.15
293	P35580	sp	MYH10_HUMAN	Myosin-10	MYH10	6	2.21	3.188
294	P35579	sp	MYH9_HUMAN	Myosin-9	MYH9	39	66.58	27.81
295	B7Z6Z4	tr	B7Z6Z4_HUMAN	cDNA FLJ56329, highly similar to Myosin light polypeptide 6	MYL6	2	2.71	12.18
296	Q9NR45	sp	SIAS_HUMAN	Sialic acid synthase	NANS	2	4.01	7.799
297	H0YIV4	tr	H0YIV4_HUMAN	Nucleosome assembly protein 1-like 1 (Fragment)	NAP1L1	1	2.07	4.416
298	A0A087WZQ7	tr	A0A087WZQ7_HUMAN	Beta-soluble NSF attachment protein	NAPB	1	2	3.642
299	C9J8U2	tr	C9J8U2_HUMAN	Nicotinate phosphoribosyltransferase	NAPRT	1	2	2.449
300	O43776	sp	SYNC_HUMAN	Asparagine--tRNA ligase, cytoplasmic	NARS	1	0.9	2.007
301	F5H5R8	tr	F5H5R8_HUMAN	Arylamine N-acetyltransferase 1	NAT1	2	4	8.807
302	Q6ZNJ1	sp	NBEL2_HUMAN	Neurobeachin-like protein 2	NBEAL2	4	8.36	2.614
303	P19338	sp	NUCL_HUMAN	Nucleolin	NCL	1	2	1.972
304	Q92859	sp	NEO1_HUMAN	Neogenin	NEO1	1	2.05	1.574
305	P14543	sp	NID1_HUMAN	Nidogen-1	NID1	1	2.01	0.8821
306	E9PLK3	tr	E9PLK3_HUMAN	Aminopeptidase	NPEPPS	2	3.18	3.716
307	P06748	sp	NPM_HUMAN	Nucleophosmin	NPM1	1	2	7.143
308	Q5JWQ6	tr	Q5JWQ6_HUMAN	Neuropilin	NRP1	1	2	2.585
309	I3L0N3	tr	I3L0N3_HUMAN	Vesicle-fusing ATPase	NSF	2	2.79	3.789
310	P61970	sp	NTF2_HUMAN	Nuclear transport factor 2	NUTF2	1	2.09	21.26
311	P20774	sp	MIME_HUMAN	Mimecan	OGN	9	12.01	26.85
312	Q8WWZ8	sp	OIT3_HUMAN	Oncoprotein-induced transcript 3 protein	OIT3	2	4	4.404
313	J3KQ32	tr	J3KQ32_HUMAN	Obg-like ATPase 1	OLA1	2	4	6.731
314	B4DNG0	tr	B4DNG0_HUMAN	cDNA FLJ58142, highly similar to olfactomedin-like protein 3	OLFML3	2	4.05	9.565
315	Q99983	sp	OMD_HUMAN	Osteomodulin	OMD	1	2	1.663
316	J3KR44	tr	J3KR44_HUMAN	Ubiquitin thioesterase	OTUB1	1	2.01	6.985
317	P13674	sp	P4HA1_HUMAN	Prolyl 4-hydroxylase subunit alpha-1	P4HA1	3	4.62	8.614
318	A0A087WTT1	tr	A0A087WTT1_HUMAN	Polyadenylate-binding protein	PABPC1	1	1.19	3.065
319	P68402	sp	PA1B2_HUMAN	Platelet-activating factor acetylhydrolase IB subunit beta	PAFAH1B2	1	2	8.297
320	E9PBS1	tr	E9PBS1_HUMAN	Multifunctional protein ADE2 (Fragment)	PAICS	1	0.83	3.39
321	P09874	sp	PARP1_HUMAN	Poly [ADP-ribose] polymerase 1	PARP1	1	2	1.479
322	Q9HBI1	sp	PARVB_HUMAN	Beta-parvin	PARVB	2	4.74	7.692
323	Q15365	sp	PCBP1_HUMAN	Poly(rC)-binding protein 1	PCBP1	2	3.02	8.146
324	F8VZX2	tr	F8VZX2_HUMAN	Poly(rC)-binding protein 2	PCBP2	1	2.02	4.984
325	Q9NPG4	sp	PCD12_HUMAN	Protocadherin-12	PCDH12	1	2	1.098
326	P12004	sp	PCNA_HUMAN	Proliferating cell nuclear antigen	PCNA	1	0.8	8.046
327	Q8NBM8	sp	PCYXL_HUMAN	Prenylcysteine oxidase-like	PCYOX1L	1	2	2.227
328	Q8WUM4	sp	PDC6I_HUMAN	Programmed cell death 6-interacting protein	PDCD6IP	3	4.29	4.839
329	O76074	sp	PDE5A_HUMAN	cGMP-specific 3',5'-cyclic phosphodiesterase	PDE5A	1	2.49	1.371
330	P30101	sp	PDIA3_HUMAN	Protein disulfide-isomerase A3	PDIA3	4	7.52	10.1
331	P30086	sp	PEBP1_HUMAN	Phosphatidylethanolamine-binding protein 1	PEBP1	1	2	7.487
332	P12955	sp	PEPD_HUMAN	Xaa-Pro dipeptidase	PEPD	1	2.05	2.028
333	O15067	sp	PUR4_HUMAN	Phosphoribosylformylglycinamidine synthase	PFAS	2	2.04	2.242
334	Q01813	sp	PFKAP_HUMAN	ATP-dependent 6-phosphofructokinase, platelet type	PFKP	3	6	5.995
335	P07737	sp	PROF1_HUMAN	Profilin-1	PFN1	10	16.7	65.71
336	P18669	sp	PGAM1_HUMAN	Phosphoglycerate mutase 1	PGAM1	2	4	13.78
337	P52209	sp	6PGD_HUMAN	6-phosphogluconate dehydrogenase, decarboxylating	PGD	3	4.27	8.489
338	P00558	sp	PGK1_HUMAN	Phosphoglycerate kinase 1	PGK1	15	23.59	47.96
339	O95336	sp	6PGL_HUMAN	6-phosphogluconolactonase	PGLS	2	2.11	10.08
340	P36871	sp	PGM1_HUMAN	Phosphoglucomutase-1	PGM1	20	32.84	51.96
341	A0A286YFL2	tr	A0A286YFL2_HUMAN	D-3-phosphoglycerate dehydrogenase	PHGDH	4	4.07	12.59
342	Q86WI1	sp	PKHL1_HUMAN	Fibrocystin-L	PKHD1L1	2	2.06	0.6599
343	P30613	sp	KPYR_HUMAN	Pyruvate kinase PKLR	PKLR	4	6	12.02
344	P14618	sp	KPYM_HUMAN	Pyruvate kinase PKM	PKM	36	49.5	57.06
345	P08567	sp	PLEK_HUMAN	Pleckstrin	PLEK	3	4.09	16.86
346	P00747	sp	PLMN_HUMAN	Plasminogen	PLG	7	13.06	10.25
347	Q15063	sp	POSTN_HUMAN	Periostin	POSTN	5	10.16	10.41
348	P62937	sp	PPIA_HUMAN	Peptidyl-prolyl cis-trans isomerase A	PPIA	15	18.52	66.67
349	E9PKY5	tr	E9PKY5_HUMAN	Peptidyl-prolyl cis-trans isomerase (Fragment)	PPIE	1	2	4.225
350	F8W0W8	tr	F8W0W8_HUMAN	Serine/threonine-protein phosphatase	PPP1CC	4	8	17.17
351	H7C003	tr	H7C003_HUMAN	Protein phosphatase 1 regulatory subunit 7 (Fragment)	PPP1R7	1	2	5.373
352	P67775	sp	PP2AA_HUMAN	Serine/threonine-protein phosphatase 2A catalytic subunit alpha isoform	PPP2CA	4	6.74	20.71
353	P30153	sp	2AAA_HUMAN	Serine/threonine-protein phosphatase 2A 65 kDa regulatory subunit A alpha isoform	PPP2R1A	9	14	25.81
354	Q06830	sp	PRDX1_HUMAN	Peroxiredoxin-1	PRDX1	1	1.74	11.06
355	P32119	sp	PRDX2_HUMAN	Peroxiredoxin-2	PRDX2	1	2	9.091
356	P30041	sp	PRDX6_HUMAN	Peroxiredoxin-6	PRDX6	1	2.36	7.589
357	P48147	sp	PPCE_HUMAN	Prolyl endopeptidase	PREP	1	0.67	1.972
358	P10644	sp	KAP0_HUMAN	cAMP-dependent protein kinase type I-alpha regulatory subunit	PRKAR1A	2	4	7.612
359	B1ALA9	tr	B1ALA9_HUMAN	Ribose-phosphate pyrophosphokinase 1	PRPS1	1	2.16	5.965
360	Q9Y617	sp	SERC_HUMAN	Phosphoserine aminotransferase	PSAT1	4	5.35	14.59
361	P25786	sp	PSA1_HUMAN	Proteasome subunit alpha type-1	PSMA1	9	14.72	43.73
362	A0A024RA52	tr	A0A024RA52_HUMAN	Proteasome subunit alpha type	PSMA2	6	12.71	32.91
363	P25788	sp	PSA3_HUMAN	Proteasome subunit alpha type-3	PSMA3	1	2.79	5.49
364	H0YN18	tr	H0YN18_HUMAN	Proteasome endopeptidase complex	PSMA4	4	7.36	28.26
365	P28066	sp	PSA5_HUMAN	Proteasome subunit alpha type-5	PSMA5	6	10.05	36.1
366	P60900	sp	PSA6_HUMAN	Proteasome subunit alpha type-6	PSMA6	5	10	26.02
367	O14818	sp	PSA7_HUMAN	Proteasome subunit alpha type-7	PSMA7	8	17.56	48.39
368	P20618	sp	PSB1_HUMAN	Proteasome subunit beta type-1	PSMB1	6	12.08	42.32
369	P49721	sp	PSB2_HUMAN	Proteasome subunit beta type-2	PSMB2	4	4.39	19.4
370	P49720	sp	PSB3_HUMAN	Proteasome subunit beta type-3	PSMB3	3	6.31	23.41
371	P28072	sp	PSB6_HUMAN	Proteasome subunit beta type-6	PSMB6	1	2.04	16.32
372	Q5TBG5	tr	Q5TBG5_HUMAN	Proteasome subunit beta (Fragment)	PSMB7	1	2	18.57
373	P62191	sp	PRS4_HUMAN	26S proteasome regulatory subunit 4	PSMC1	3	3.33	10.68
374	P35998	sp	PRS7_HUMAN	26S proteasome regulatory subunit 7	PSMC2	2	2.05	6.005
375	E9PM69	tr	E9PM69_HUMAN	26S proteasome regulatory subunit 6A	PSMC3	4	6.9	15.37
376	P43686	sp	PRS6B_HUMAN	26S proteasome regulatory subunit 6B	PSMC4	2	0.77	6.22
377	P62195	sp	PRS8_HUMAN	26S proteasome regulatory subunit 8	PSMC5	3	5.35	12.56
378	A0A087X2I1	tr	A0A087X2I1_HUMAN	26S proteasome regulatory subunit 10B	PSMC6	1	2	3.474
379	Q99460	sp	PSMD1_HUMAN	26S proteasome non-ATPase regulatory subunit 1	PSMD1	3	6	4.722
380	O00231	sp	PSD11_HUMAN	26S proteasome non-ATPase regulatory subunit 11	PSMD11	2	4.06	5.924
381	O00232	sp	PSD12_HUMAN	26S proteasome non-ATPase regulatory subunit 12	PSMD12	1	2	2.851
382	O00487	sp	PSDE_HUMAN	26S proteasome non-ATPase regulatory subunit 14	PSMD14	1	0.66	8.387
383	Q13200	sp	PSMD2_HUMAN	26S proteasome non-ATPase regulatory subunit 2	PSMD2	3	4.9	4.295
384	O43242	sp	PSMD3_HUMAN	26S proteasome non-ATPase regulatory subunit 3	PSMD3	1	0.81	2.06
385	Q16401	sp	PSMD5_HUMAN	26S proteasome non-ATPase regulatory subunit 5	PSMD5	8	12.13	17.26
386	P51665	sp	PSMD7_HUMAN	26S proteasome non-ATPase regulatory subunit 7	PSMD7	1	2	3.395
387	A0A087WYT3	tr	A0A087WYT3_HUMAN	Prostaglandin E synthase 3	PTGES3	2	3.64	18.29
388	Q14914	sp	PTGR1_HUMAN	Prostaglandin reductase 1	PTGR1	1	2	4.255
389	P10586	sp	PTPRF_HUMAN	Receptor-type tyrosine-protein phosphatase F	PTPRF	1	1.41	0.7866
390	Q92626	sp	PXDN_HUMAN	Peroxidasin homolog	PXDN	1	2	0.6761
391	P11216	sp	PYGB_HUMAN	Glycogen phosphorylase, brain form	PYGB	6	4.03	9.609
392	P06737	sp	PYGL_HUMAN	Glycogen phosphorylase, liver form	PYGL	11	18.09	16.06
393	P20742	sp	PZP_HUMAN	Pregnancy zone protein	PZP	87	17.97	17.14
394	P09417	sp	DHPR_HUMAN	Dihydropteridine reductase	QDPR	2	2.01	11.07
395	B5MCZ9	tr	B5MCZ9_HUMAN	Glutaminyl-peptide cyclotransferase (Fragment)	QPCT	1	2	4.93
396	Q6ZRP7	sp	QSOX2_HUMAN	Sulfhydryl oxidase 2	QSOX2	1	2	1.576
397	P61026	sp	RAB10_HUMAN	Ras-related protein Rab-10	RAB10	1	2	5.5
398	Q15907	sp	RB11B_HUMAN	Ras-related protein Rab-11B	RAB11B	2	3.29	10.55
399	P61106	sp	RAB14_HUMAN	Ras-related protein Rab-14	RAB14	1	2	6.977
400	Q9H0U4	sp	RAB1B_HUMAN	Ras-related protein Rab-1B	RAB1B	1	2.16	7.96
401	Q96S21	sp	RB40C_HUMAN	Ras-related protein Rab-40C	RAB40C	1	2	2.847
402	P51149	sp	RAB7A_HUMAN	Ras-related protein Rab-7a	RAB7A	3	6	20.77
403	P63000	sp	RAC1_HUMAN	Ras-related C3 botulinum toxin substrate 1	RAC1	3	0.92	18.75
404	B1AH80	tr	B1AH80_HUMAN	Ras-related C3 botulinum toxin substrate 2 (Rho family, small GTP binding protein Rac2), isoform CRA_c	RAC2	3	5.54	19.46
405	H0YAM7	tr	H0YAM7_HUMAN	Receptor of-activated protein C kinase 1 (Fragment)	RACK1	1	2.02	8.097
406	B5MDF5	tr	B5MDF5_HUMAN	GTP-binding nuclear protein Ran	RAN	9	17.13	36.91
407	P61224	sp	RAP1B_HUMAN	Ras-related protein Rap-1b	RAP1B	4	7.57	20.65
408	P54136	sp	SYRC_HUMAN	Arginine--tRNA ligase, cytoplasmic	RARS	1	2.01	1.515
409	A0A0A0MQT0	tr	A0A0A0MQT0_HUMAN	Retinol binding protein 1, cellular	RBP1	2	4	9.137
410	Q5VY30	tr	Q5VY30_HUMAN	Retinol-binding protein	RBP4	2	2.12	16.58
411	Q15493	sp	RGN_HUMAN	Regucalcin	RGN	3	2.01	11.71
412	P61586	sp	RHOA_HUMAN	Transforming protein RhoA	RHOA	2	4.52	7.772
413	E7EQV9	tr	E7EQV9_HUMAN	Ribosomal protein L15 (Fragment)	RPL15	1	2.03	9.195
414	J3QQ67	tr	J3QQ67_HUMAN	60S ribosomal protein L18 (Fragment)	RPL18	2	4	13.68
415	J3QR09	tr	J3QR09_HUMAN	Ribosomal protein L19	RPL19	1	2	8.808
416	J3KT29	tr	J3KT29_HUMAN	60S ribosomal protein L23	RPL23	1	2	16.39
417	P46776	sp	RL27A_HUMAN	60S ribosomal protein L27a	RPL27A	1	2.06	7.432
418	P39023	sp	RL3_HUMAN	60S ribosomal protein L3	RPL3	1	0.96	2.73
419	P36578	sp	RL4_HUMAN	60S ribosomal protein L4	RPL4	7	13.12	15.93
420	A8MUD9	tr	A8MUD9_HUMAN	60S ribosomal protein L7	RPL7	2	4.07	12.02
421	P62424	sp	RL7A_HUMAN	60S ribosomal protein L7a	RPL7A	1	2.28	6.015
422	P62917	sp	RL8_HUMAN	60S ribosomal protein L8	RPL8	1	0.59	6.226
423	P05386	sp	RLA1_HUMAN	60S acidic ribosomal protein P1	RPLP1	1	2	14.04
424	A0A1W2PQS6	tr	A0A1W2PQS6_HUMAN	RPS10-NUDT3 readthrough	RPS10-NUDT3	1	2	3.093
425	P15880	sp	RS2_HUMAN	40S ribosomal protein S2	RPS2	1	2.05	3.754
426	M0R0R2	tr	M0R0R2_HUMAN	40S ribosomal protein S5	RPS5	1	2	6.667
427	P51812	sp	KS6A3_HUMAN	Ribosomal protein S6 kinase alpha-3	RPS6KA3	1	2	2.703
428	C9J9K3	tr	C9J9K3_HUMAN	40S ribosomal protein SA (Fragment)	RPSA	3	6.6	22.05
429	P23921	sp	RIR1_HUMAN	Ribonucleoside-diphosphate reductase large subunit	RRM1	4	6.91	8.586
430	Q9Y265	sp	RUVB1_HUMAN	RuvB-like 1	RUVBL1	2	3.53	7.895
431	Q9Y6B6	sp	SAR1B_HUMAN	GTP-binding protein SAR1b	SAR1B	1	2	5.556
432	O14828	sp	SCAM3_HUMAN	Secretory carrier-associated membrane protein 3	SCAMP3	1	2	4.611
433	Q8WVM8	sp	SCFD1_HUMAN	Sec1 family domain-containing protein 1	SCFD1	1	2	2.181
434	Q15019	sp	SEPT2_HUMAN	Septin-2	SEPTIN2	2	3.5	9.695
435	E7EPK1	tr	E7EPK1_HUMAN	Septin-7	SEPTIN7	2	2.78	10.76
436	G3V2W1	tr	G3V2W1_HUMAN	Protein Z-dependent protease inhibitor	SERPINA10	1	0.68	2.066
437	P05543	sp	THBG_HUMAN	Thyroxine-binding globulin	SERPINA7	2	2.24	4.819
438	P01008	sp	ANT3_HUMAN	Antithrombin-III	SERPINC1	23	24.06	39.66
439	P05546	sp	HEP2_HUMAN	Heparin cofactor 2	SERPIND1	1	2.14	3.607
440	P36955	sp	PEDF_HUMAN	Pigment epithelium-derived factor	SERPINF1	13	14.04	28.71
441	A0A0G2JPA8	tr	A0A0G2JPA8_HUMAN	Alpha-2-antiplasmin	SERPINF2	5	6	13.11
442	A0A087WW40	tr	A0A087WW40_HUMAN	Endophilin-B1	SH3GLB1	1	2	3.807
443	I3L145	tr	I3L145_HUMAN	Sex hormone-binding globulin, isoform CRA_a	SHBG	4	8	21.22
444	P34896	sp	GLYC_HUMAN	Serine hydroxymethyltransferase, cytosolic	SHMT1	3	5.67	9.317
445	H3BRE9	tr	H3BRE9_HUMAN	Transporter	SLC6A2	1	2	1.399
446	A0A087WYN0	RRRRRtr	A0A087WYN0_HUMAN	REVERSED Transporter	SLC6A6	1	0.99	1.304
447	H0YEP5	tr	H0YEP5_HUMAN	Sphingomyelin phosphodiesterase (Fragment)	SMPD1	1	2	3.47
448	Q7KZF4	sp	SND1_HUMAN	Staphylococcal nuclease domain-containing protein 1	SND1	2	1.02	4.615
449	Q00796	sp	DHSO_HUMAN	Sorbitol dehydrogenase	SORD	2	2.79	12.04
450	D6R9Q3	tr	D6R9Q3_HUMAN	Spermatogenesis-associated protein 24	SPATA24	1	2	5.946
451	Q13103	sp	SPP24_HUMAN	Secreted phosphoprotein 24	SPP2	1	2	5.687
452	P84103	sp	SRSF3_HUMAN	Serine/arginine-rich splicing factor 3	SRSF3	2	3.77	12.8
453	P50502	sp	F10A1_HUMAN	Hsc70-interacting protein	ST13	1	1.76	4.607
454	P42224	sp	STAT1_HUMAN	Signal transducer and activator of transcription 1-alpha/beta	STAT1	3	6.02	5.2
455	P40763	sp	STAT3_HUMAN	Signal transducer and activator of transcription 3	STAT3	1	1.23	2.857
456	K7EK35	tr	K7EK35_HUMAN	Signal transducer and activator of transcription	STAT5A	1	2	1.573
457	P02808	sp	STAT_HUMAN	Statherin	STATH	2	4	54.84
458	P31948	sp	STIP1_HUMAN	Stress-induced-phosphoprotein 1	STIP1	1	2	2.394
459	P53999	sp	TCP4_HUMAN	Activated RNA polymerase II transcriptional coactivator p15	SUB1	2	4.05	18.9
460	B4DLP0	tr	B4DLP0_HUMAN	Sulfotransferase	SULT1C2	1	0.59	3.226
461	X6RJP6	tr	X6RJP6_HUMAN	Transgelin-2 (Fragment)	TAGLN2	4	8.07	31.02
462	P26639	sp	SYTC_HUMAN	Threonine--tRNA ligase, cytoplasmic	TARS	2	2.73	4.703
463	Q8TC07	sp	TBC15_HUMAN	TBC1 domain family member 15	TBC1D15	1	2	1.737
464	P17987	sp	TCPA_HUMAN	T-complex protein 1 subunit alpha	TCP1	2	3.44	6.295
465	P02787	sp	TRFE_HUMAN	Serotransferrin	TF	4	4	6.017
466	P01266	sp	THYG_HUMAN	Thyroglobulin	TG	6	7.35	2.854
467	O43294	sp	TGFI1_HUMAN	Transforming growth factor beta-1-induced transcript 1 protein	TGFB1I1	2	3.55	5.423
468	Q15582	sp	BGH3_HUMAN	Transforming growth factor-beta-induced protein ig-h3	TGFBI	6	5.33	14.79
469	Q03167	sp	TGBR3_HUMAN	Transforming growth factor beta receptor type 3	TGFBR3	1	1.04	1.763
470	P07996	sp	TSP1_HUMAN	Thrombospondin-1	THBS1	38	47.62	31.79
471	E7ES19	tr	E7ES19_HUMAN	Thrombospondin-4	THBS4	8	12.81	13.1
472	P35590	sp	TIE1_HUMAN	Tyrosine-protein kinase receptor Tie-1	TIE1	4	6.33	5.975
473	Q9Y490	sp	TLN1_HUMAN	Talin-1	TLN1	98	156.59	50.85
474	Q99805	sp	TM9S2_HUMAN	Transmembrane 9 superfamily member 2	TM9SF2	1	2	2.112
475	Q92973	sp	TNPO1_HUMAN	Transportin-1	TNPO1	1	2	1.336
476	Q16473	sp	TENXA_HUMAN	Putative tenascin-XA	TNXA	1	2	6.109
477	A0A3B3ISX9	tr	A0A3B3ISX9_HUMAN	Tenascin-X	TNXB	2	2.24	0.6903
478	P60174	sp	TPIS_HUMAN	Triosephosphate isomerase	TPI1	5	10.7	33.22
479	Q5VZU9	tr	Q5VZU9_HUMAN	Tripeptidyl-peptidase 2	TPP2	1	2.04	2.219
480	Q5W0H4	tr	Q5W0H4_HUMAN	Translationally-controlled tumor protein	TPT1	1	0.68	6.915
481	Q71U36	sp	TBA1A_HUMAN	Tubulin alpha-1A chain	TUBA1A	35	10.12	59.2
482	P68366	sp	TBA4A_HUMAN	Tubulin alpha-4A chain	TUBA4A	34	38.86	60.71
483	P07437	sp	TBB5_HUMAN	Tubulin beta chain	TUBB	36	51.31	69.37
484	Q9H4B7	sp	TBB1_HUMAN	Tubulin beta-1 chain	TUBB1	26	14.3	39.69
485	P04350	sp	TBB4A_HUMAN	Tubulin beta-4A chain	TUBB4A	30	10.01	65.32
486	K7ER96	tr	K7ER96_HUMAN	Thioredoxin-like protein 1 (Fragment)	TXNL1	1	0.91	2.491
487	P22314	sp	UBA1_HUMAN	Ubiquitin-like modifier-activating enzyme 1	UBA1	16	26.19	22.78
488	Q96C32	tr	Q96C32_HUMAN	Polyubiquitin-C	UBC	1	2.07	20.98
489	Q5T4S7	sp	UBR4_HUMAN	E3 ubiquitin-protein ligase UBR4	UBR4	2	4.06	0.8875
490	D6R956	tr	D6R956_HUMAN	Ubiquitin carboxyl-terminal hydrolase	UCHL1	1	1.48	7.469
491	O60701	sp	UGDH_HUMAN	UDP-glucose 6-dehydrogenase	UGDH	8	14.94	26.11
492	A0A087WYS1	tr	A0A087WYS1_HUMAN	UTP--glucose-1-phosphate uridylyltransferase	UGP2	2	4	5.906
493	Q9UBR1	sp	BUP1_HUMAN	Beta-ureidopropionase	UPB1	1	1.1	3.906
494	P06132	sp	DCUP_HUMAN	Uroporphyrinogen decarboxylase	UROD	3	2.55	11.99
495	O60763	sp	USO1_HUMAN	General vesicular transport factor p115	USO1	1	2	1.663
496	P45974	sp	UBP5_HUMAN	Ubiquitin carboxyl-terminal hydrolase 5	USP5	2	4	4.079
497	P26640	sp	SYVC_HUMAN	Valine--tRNA ligase	VARS	1	2	1.266
498	Q6EMK4	sp	VASN_HUMAN	Vasorin	VASN	2	2.05	4.309
499	P50552	sp	VASP_HUMAN	Vasodilator-stimulated phosphoprotein	VASP	3	5.04	10.53
500	P18206	sp	VINC_HUMAN	Vinculin	VCL	5	8.76	7.231
501	P55072	sp	TERA_HUMAN	Transitional endoplasmic reticulum ATPase	VCP	15	28.93	28.78
502	O95497	sp	VNN1_HUMAN	Pantetheinase	VNN1	1	2	3.704
503	Q96QK1	sp	VPS35_HUMAN	Vacuolar protein sorting-associated protein 35	VPS35	1	2.21	1.884
504	P04004	sp	VTNC_HUMAN	Vitronectin	VTN	23	13.66	14.23
505	P23381	sp	SYWC_HUMAN	Tryptophan--tRNA ligase, cytoplasmic	WARS	1	2	4.883
506	O75083	sp	WDR1_HUMAN	WD repeat-containing protein 1	WDR1	9	18.02	29.7
507	Q5T6H7	tr	Q5T6H7_HUMAN	Xaa-Pro aminopeptidase 1	XPNPEP1	7	10.58	14.31
508	O14980	sp	XPO1_HUMAN	Exportin-1	XPO1	2	4.65	2.894
509	A0A3B3IRM4	tr	A0A3B3IRM4_HUMAN	Xylulose kinase	XYLB	1	2.05	2.883
510	P31946	sp	1433B_HUMAN	14-3-3 protein beta/alpha	YWHAB	2	1.14	11.79
511	P62258	sp	1433E_HUMAN	14-3-3 protein epsilon	YWHAE	3	5.57	13.33
512	P61981	sp	1433G_HUMAN	14-3-3 protein gamma	YWHAG	2	2	9.717
513	P27348	sp	1433T_HUMAN	14-3-3 protein theta	YWHAQ	2	0.76	8.98
514	E7EX29	tr	E7EX29_HUMAN	14-3-3 protein zeta/delta (Fragment)	YWHAZ	3	3.36	14.63
515	B4E1Z4	tr	B4E1Z4_HUMAN	cDNA FLJ55673, highly similar to Complement factor B	N/A	7	8.53	6.872
516	A0A2R8Y7X9	tr	A0A2R8Y7X9_HUMAN	Uncharacterized protein	N/A	10	6.9	22.62
517	A0A0U1RRH7	tr	A0A0U1RRH7_HUMAN	Histone H2A	N/A	6	2	27.06
*sp: SwissProt; tr: TrEMBL

## Sheet: UPR_ER_Proteins
#	UniProt Accession Number	Gene Name
	GO:0030968_Endoplasmic reticulum unfolded protein response		GO:0036498_IRE1-mediated unfolded protein response	MM1S Exos
1	P49748	ACADVL	X
2	P35611	ADD1
3	O95994	AGR2	X
4	Q9UKV5	AMFR
5	Q8N6T3	ARFGAP1
6	O43681	ASNA1	X
7	P08243	ASNS		X
8	P18847	ATF3
9	P18848	ATF4
10	P18850	ATF6
11	Q99941	ATF6B
12	P61421	ATP6V0D1	X
13	Q16611	BAK1	X
14	Q07812	BAX	X
15	O43521	BCL2L11	X
16	Q9NZS9	BFAR	X
17	Q7RTS1	BHLHA15
18	Q9UMX3	BOK
19	P27797	CALR
20	Q96L12	CALR3
21	P27824	CANX
22	P13500	CCL2
23	P24385	CCND1
24	Q96JB5	CDK5RAP3
25	O14967	CLGN
26	Q92905	COPS5	X
27	O43889	CREB3
28	Q96BA8	CREB3L1
29	Q70SY1	CREB3L2
30	Q68CJ9	CREB3L3
31	Q8TEY5	CREB3L4
32	Q8IUR6	CREBRF
33	O14595	CTDSP2	X
34	P32929	CTH
35	Q14999	CUL7	X
36	P10145	CXCL8
37	Q9P0U4	CXXC1	X
38	Q5VWQ8	DAB2IP	X
39	Q14203	DCTN1	X
40	P35638	DDIT3
41	Q96FC9	DDX11	X
42	Q9BUN8	DERL1
43	Q9GZP9	DERL2
44	Q96Q80	DERL3
45	Q9UBS4	DNAJB11	X
46	Q9UBS3	DNAJB9	X
47	Q13217	DNAJC3	X
48	Q92611	EDEM1	X
49	P19525	EIF2AK2
50	Q9NZJ5	EIF2AK3
51	P05198	EIF2S1
52	Q09472	EP300
53	O75460	ERN1	X
54	Q76MJ5	ERN2	X
55	Q96HE7	ERO1A
56	Q92935	EXTL1	X
57	Q9UBQ6	EXTL2	X
58	O43909	EXTL3	X
59	Q9NSA1	FGF21
60	Q9BVA6	FICD	X
61	Q9NWM8	FKBP14	X
62	Q06210	GFPT1	X	X
63	O14653	GOSR2	X
64	P49840	GSK3A	X
65	P51858	HDGF	X
66	Q15011	HERPUD1
67	Q9BSE4	HERPUD2
68	P14625	HSP90B1		X
69	P11021	HSPA5	X	X
70	Q9Y4L1	HYOU1	X
71	P08833	IGFBP1
72	O43731	KDELR3	X
73	Q9BQ90	KLHDC3	X
74	P02545	LMNA	X
75	Q14703	MBTPS1		X
76	O43462	MBTPS2
77	Q969H8	MYDGF	X
78	P16333	NCK1
79	O43639	NCK2
80	Q16236	NFE2L2
81	Q8N5Y8	PARP16	X
82	Q2NL67	PARP6
83	Q8N3A8	PARP8
84	Q14554	PDIA5	X
85	Q15084	PDIA6	X
86	P27986	PIK3R1
87	P0C869	PLA2G4B	X
88	O75807	PPP1R15A
89	Q5SWA1	PPP1R15B
90	Q15173	PPP2R5B	X
91	Q9HCU5	PREB	X
92	P18031	PTPN1	X
93	P17706	PTPN2
94	P63244	RACK1		X
95	Q6NTF9	RHBDD2
96	O94979	SEC31A	X
97	Q9BQE4	SELENOS
98	Q9Y6X1	SERP1	X
99	Q8N6R1	SERP2
100	P29353	SHC1	X
101	P08240	SRPRA	X
102	Q9Y5M8	SRPRB	X
103	P43307	SSR1	X
104	O76061	STC2
105	Q9UNE7	STUB1
106	P0DMM9	SULT1A3	X
107	Q86TM6	SYVN1	X
108	Q93075	TATDN2	X
109	Q9Y4P3	TBL2
110	Q9Y490	TLN1	X	X
111	P57088	TMEM33	X
112	O14773	TPP1	X
113	Q9H2G4	TSPYL2	X
114	O95292	VAPB
115	P55072	VCP		X
116	O76024	WFS1
117	Q5MNZ9	WIPI1	X
118	P17861	XBP1	X
119	O95070	YIF1A	X
120	Q5VVQ6	YOD1
121	Q13105	ZBTB17	X
